# Supplementary material
Source: bioRxiv or medRxiv preprint supplement (https://www.biorxiv.org/highwire/filestream/6591/field_highwire_adjunct_files/15/024869-6.pdf)

Single SNP Crossover? ■ no ■ yes

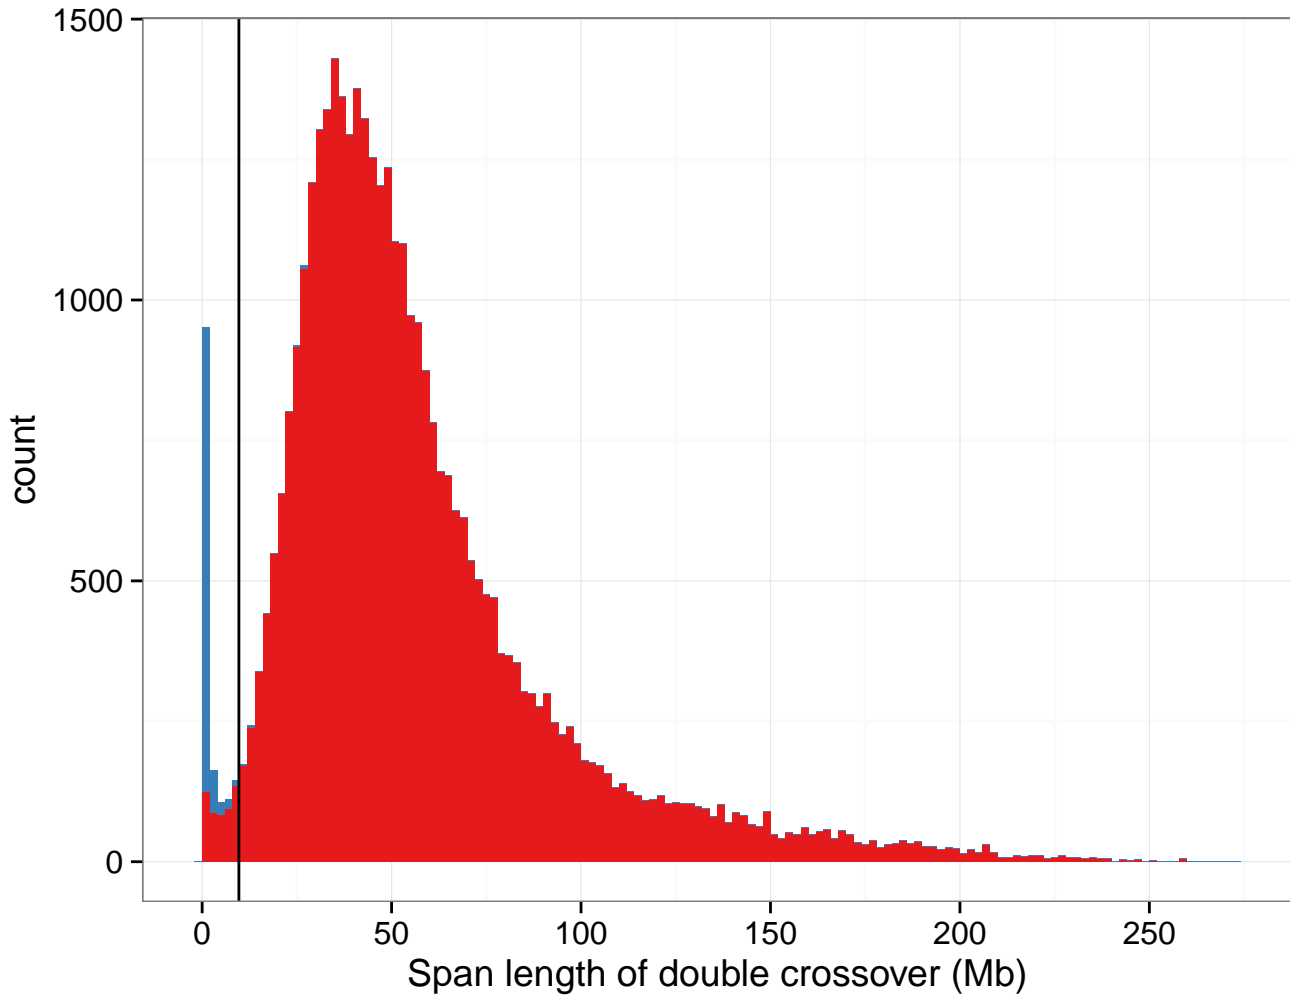

Supplement: Supplementary file [file 024869-6.pdf]
